# Supplementary material for: Brief communication: An alternative method for estimating the scavenging efficiency of black carbon by meltwater over sea ice
Source: Copernicus journal article supplement (doi:10.5194/tc-2019-147), 2019-07-08
Supplement: Supplementary file 1 [file tc-2019-147-supplement.pdf]

**Table S1.** BC concentration (unit: ng g<sup>-1</sup>) observed in the ice layer and its overlying snow and in the surface melting snow. Snow sampling were carried out over the Elson Lagoon, Chukchi Sea and Canada Basin. The sampling locations and dates are also shown.

| Sampling area | Lat (°N) | Lon (°W) | BC (Ice layer) | BC (The overlying snow) | Sampling date                 | BC (Surface melting snow) | Sampling date                | Expedition                                     |
|---------------|----------|----------|----------------|-------------------------|-------------------------------|---------------------------|------------------------------|------------------------------------------------|
| Canada Basin  | 75.03    | 159.48   | 0.39           | 2.93                    | July 22 <sup>st</sup> , 2010  | --                        | --                           | 1 <sup>st</sup> South Korean Arctic Expedition |
| Canada Basin  | 77.98    | 159.64   | 0.54           | 3.81                    | July 26 <sup>st</sup> , 2010  | --                        | --                           | 1 <sup>st</sup> South Korean Arctic Expedition |
| Canada Basin  | 79.51    | 160.02   | 0.45           | 3.32                    | August 1 <sup>st</sup> , 2010 | --                        | --                           | 1 <sup>st</sup> South Korean Arctic Expedition |
| Elson Lagoon  | 71.32    | 156.37   | 0.36           | 1.72                    | May 18 <sup>th</sup> , 2015   | 14.9                      | May 31 <sup>th</sup> , 2015  | Barrow Expedition                              |
| Elson Lagoon  | 71.32    | 156.37   | 0.31           | 1.70                    | May 22 <sup>th</sup> , 2015   | 15.3                      | May 31 <sup>th</sup> , 2015  | Barrow Expedition                              |
| Elson Lagoon  | 71.32    | 156.38   | 0.41           | 1.98                    | May 22 <sup>th</sup> , 2015   | 17.9                      | May 31 <sup>th</sup> , 2015  | Barrow Expedition                              |
| Chukchi Sea   | 71.37    | 156.54   | 0.48           | 2.11                    | May 25 <sup>th</sup> , 2017   | 16.1                      | June 5 <sup>th</sup> , 2017  | Barrow Expedition                              |
| Chukchi Sea   | 71.37    | 156.54   | 0.34           | 1.82                    | May 27 <sup>th</sup> , 2017   | 16.1                      | June 5 <sup>th</sup> , 2017  | Barrow Expedition                              |
| Chukchi Sea   | 71.37    | 156.54   | 0.55           | 2.91                    | May 28 <sup>th</sup> , 2017   | 17                        | June 5 <sup>th</sup> , 2017  | Barrow Expedition                              |
| Chukchi Sea   | 71.37    | 156.55   | 0.50           | 2.43                    | May 30 <sup>th</sup> , 2018   | 14.2                      | June 10 <sup>th</sup> , 2018 | Barrow Expedition                              |
| Chukchi Sea   | 71.37    | 156.55   | 0.36           | 2.11                    | May 30 <sup>th</sup> , 2018   | 15.9                      | June 10 <sup>th</sup> , 2018 | Barrow Expedition                              |
| Chukchi Sea   | 71.37    | 156.55   | 0.41           | 2.33                    | May 30 <sup>th</sup> , 2018   | 14.8                      | June 10 <sup>th</sup> , 2018 | Barrow Expedition                              |

|         |       |        |      |      |                        |      |                         |            |
|---------|-------|--------|------|------|------------------------|------|-------------------------|------------|
| Sea     |       |        |      |      | 2018                   |      | 2018                    | Expedition |
| Chukchi |       |        |      |      | May 31 <sup>th</sup> , |      | June 10 <sup>th</sup> , | Barrow     |
| Sea     | 71.37 | 156.55 | 0.43 | 2.52 | 2018                   | 17.3 | 2018                    | Expedition |
| Chukchi |       |        |      |      | May 31 <sup>th</sup> , |      | June 10 <sup>th</sup> , | Barrow     |
| Sea     | 71.37 | 156.55 | 0.31 | 2.14 | 2018                   | 17.5 | 2018                    | Expedition |

---

**Table S2.** Snow thickness, snow density and BC concentrations before and after the ablation event, and the thickness of ice layer is also shown. BC values of ice layers have been presented in Table 1.

| Area         | Site | lat (°N) | lon (°W) | $h_i$ (cm) | $\rho_i$ (g cm <sup>-3</sup> ) | $C_{bi}$ (ng g <sup>-1</sup> ) | $h_2$ (cm) | $\rho_2$ (g cm <sup>-3</sup> ) | $h_i$ (cm) |
|--------------|------|----------|----------|------------|--------------------------------|--------------------------------|------------|--------------------------------|------------|
| Elson Lagoon | 1    | 71.32    | 156.37   | 5.5        | 0.32                           | 1.22                           | 3.0        | 0.36                           | 0.7        |
| Elson Lagoon | 2    | 71.32    | 156.37   | 5.4        | 0.30                           | 1.07                           | 2.5        | 0.35                           | 0.8        |
| Elson Lagoon | 3    | 71.32    | 156.38   | 10.9       | 0.32                           | 1.11                           | 5.0        | 0.35                           | 1.7        |
| Chukchi Sea  | 4    | 71.38    | 156.55   | 11.3       | 0.31                           | 1.34                           | 5.0        | 0.36                           | 1.8        |
| Chukchi Sea  | 5    | 71.38    | 156.55   | 13.2       | 0.29                           | 0.91                           | 4.0        | 0.35                           | 2.5        |
| Chukchi Sea  | 6    | 71.38    | 156.55   | 8.5        | 0.25                           | 1.84                           | 3.0        | 0.36                           | 1.0        |

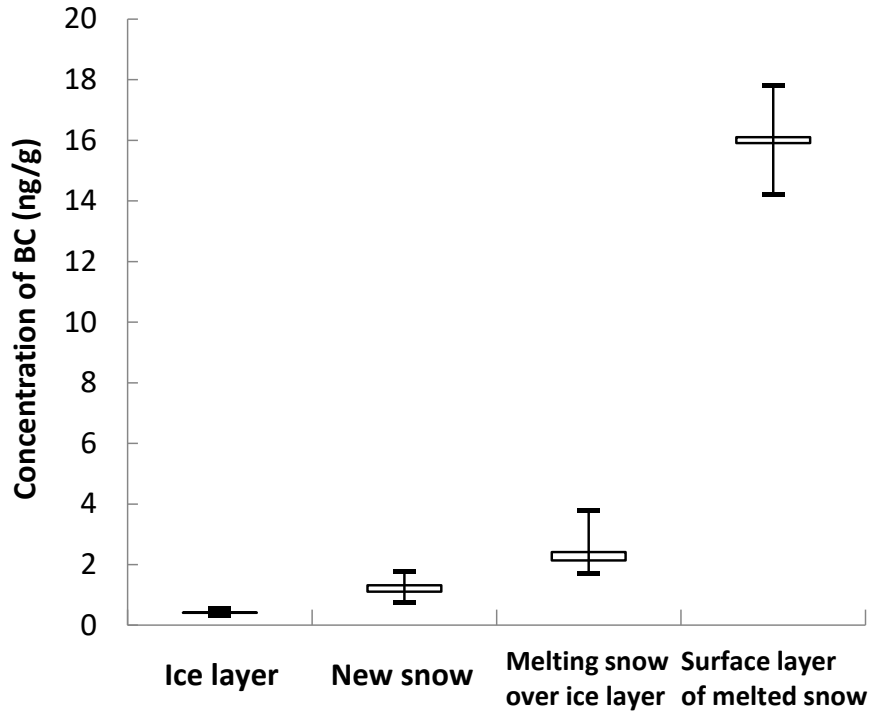

**Figure S1.** The BC concentrations in the ice layer and melting snow, and its concentrations in the new snow and in the surface layer of melting snow are also shown as a comparison.

New-snow samples were only collected in Elson Lagoon and Chukchi Sea during the measurement period. The box indicates the mean (upper) and median (bottom) values of the observations, and the whiskers constrain the full extent of the observations.

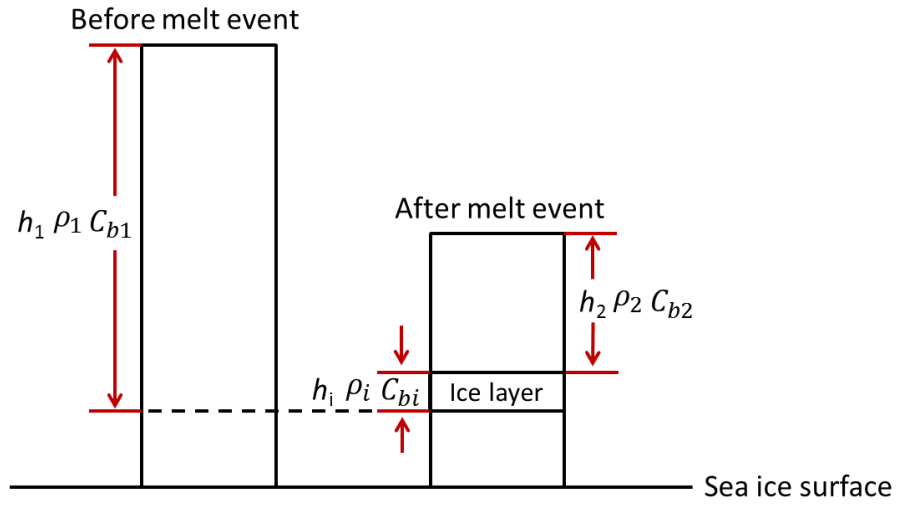

**Figure S2.** Conceptual sketch of snow overlying sea ice before and after the melt event.

Variables relating to the snow and ice layer mentioned in Eq. (1) and Eq. (2) are shown.
